# Supplementary material for: Access to General Practitioners during the COVID-19 pandemic in Portugal—A survey study of patient experiences in an urban setting
Source: PLOS journal article supplement (doi:10.1371/journal.pone.0285899), 2023-05-23
Supplement: S6 (10.1371/journal.pone.0285899.s006) [file journal.pone.0285899.s006]

**S5 Table. Odds Ratio of reporting response over three working days when contacting the GP by e-mail.**

|                                                |              | OR                      |                         |                         |
|------------------------------------------------|--------------|-------------------------|-------------------------|-------------------------|
|                                                |              | crude                   | adjusted SD             | adjusted SD+health*     |
| <b>sex</b>                                     | female       |                         |                         |                         |
|                                                | male         | 1.23 [0.70-2.15]        | 1.46 [0.80-2.65]        | 1.30 [0.70-2.42]        |
| <b>age</b>                                     | <40          |                         |                         |                         |
|                                                | 40-54        | 0.92 [0.46-1.83]        | 0.95 [0.46-1.93]        | 0.93 [0.44-2.00]        |
|                                                | 55-64        | 0.89 [0.39-2.04]        | 0.88 [0.37-2.05]        | 0.81 [0.32-2.07]        |
|                                                | 65-74        | 1.00 [0.42-2.38]        | 0.86 [0.33-2.26]        | 0.88 [0.31-2.48]        |
|                                                | ≥ 75         | 0.86 [0.30-2.46]        | 0.56 [0.16-1.93]        | 0.50 [0.13-1.89]        |
| <b>marital status</b>                          | married      |                         |                         |                         |
|                                                | unmarried    | 1.31 [0.76-2.26]        | 1.43 [0.80-2.57]        | 1.32 [0.71-2.43]        |
| <b>education</b>                               | ≤ 4th        |                         |                         |                         |
|                                                | 6th or 9th   | 0.57 [0.22-1.51]        | 0.46 [0.16-1.33]        | 0.55 [0.18-1.67]        |
|                                                | 11th or 12th | 0.57 [0.24-1.36]        | 0.44 [0.16-1.22]        | 0.66 [0.22-2.00]        |
|                                                | university   | 0.85 [0.38-1.90]        | 0.68 [0.26-1.78]        | 0.99 [0.34-2.84]        |
| <b>years with same GP</b>                      | 0-<1         |                         |                         |                         |
|                                                | 1-4          | 0.61 [0.25-1.52]        | <b>0.22 [0.07-0.77]</b> | 0.63 [0.25-1.60]        |
|                                                | 5-10         | <b>0.27 [0.11-0.69]</b> | <b>0.29 [0.08-0.97]</b> | <b>0.29 [0.11-0.73]</b> |
|                                                | >10          | <b>0.31 [0.13-0.73]</b> | <b>0.30 [0.10-0.90]</b> | <b>0.30 [0.13-0.72]</b> |
| <b>self-perceived health status</b>            | poor         |                         |                         |                         |
|                                                | fair         | 0.55 [0.22-1.39]        | 0.60 [0.22-1.64]        | 0.63 [0.23-1.76]        |
|                                                | good         | 0.40 [0.16-1.00]        | 0.41 [0.15-1.14]        | 0.44 [0.16-1.26]        |
|                                                | very good    | 0.43 [0.17-1.08]        | 0.38 [0.13-1.13]        | 0.38 [0.13-1.16]        |
| <b>prescriptions by text message</b>           | difficult    |                         |                         |                         |
|                                                | easy         | 0.55 [0.20-1.54]        | 0.56 [0.19-1.67]        | 0.55 [0.18-1.71]        |
| <b>prescriptions by e-mail</b>                 | difficult    |                         |                         |                         |
|                                                | easy         | <b>0.15 [0.04-0.57]</b> | <b>0.10 [0.02-0.45]</b> | <b>0.11 [0.02-0.52]</b> |
| <b>book appointment on patient portal</b>      | difficult    |                         |                         |                         |
|                                                | easy         | 0.46 [0.19-1.08]        | 0.43 [0.17-1.12]        | 0.47 [0.17-1.29]        |
| <b>request prescriptions on patient portal</b> | difficult    |                         |                         |                         |
|                                                | easy         | 0.35 [0.12-1.03]        | 0.40 [0.12-1.38]        | 0.41 [0.11-1.52]        |
| <b>insert data on patient portal</b>           | difficult    |                         |                         |                         |
|                                                | easy         | 0.34 [0.11-1.11]        | 0.33 [0.09-1.21]        | 0.31 [0.06-1.28]        |

OR: Odds Ratio; IC: confidence intervals; SD: sociodemographics (sex, age, marital status and education); GP: General Practitioner

\*health variables; years registered with the same General Practitioner; self-perceived health status

**bold:** statistically significant
